# Supplementary material for: Impact of Aging on the Phenotype of Invariant Natural Killer T Cells in Mouse Thymus
Source: PubMed Central journal article supplement (PMC7662090; doi:10.3389/fimmu.2020.575764), 2020-10-30
Supplement: DataSheet_1.pdf [file DataSheet_1.pdf]

**Supplementary table S1A.** Expression of selected signature genes in young adult and aged iNKT cells according to sequencing data (numbers of RNA reads). **iNKT1=red**; **iNKT2=green**; **iNKT17=blue**. \*: signature genes not known so far.

| Gene             | Reads young adult iNKT cells |              |                | Reads aged iNKT cells |                |                |
|------------------|------------------------------|--------------|----------------|-----------------------|----------------|----------------|
|                  | iNKT1                        | iNKT2        | iNKT17         | iNKT1                 | iNKT2p         | iNKT17         |
| <i>Tbx21</i>     | 1,579<br>1,560               | 80<br>100    | 18<br>14       | 2,168<br>1,920        | 104<br>38      | 15<br>19       |
| <i>Slamf7</i>    | 1,579<br>988                 | 0<br>0       | 4<br>1         | 1,568<br>1,672        | 11<br>12       | 0<br>0         |
| <i>Fgl2</i>      | 6,433<br>7,365               | 19<br>0      | 2<br>2         | 5,995<br>5,664        | 4<br>18        | 2<br>11        |
| <i>Klra3</i>     | 1,900<br>1,956               | 46<br>76     | 28<br>11       | 1,785<br>2,117        | 47<br>25       | 0<br>0         |
| <i>Nkg7</i>      | 2,454<br>3,436               | 3<br>24      | 8<br>16        | 2,194<br>2,155        | 11<br>3        | 3<br>0         |
| <i>Ccl5</i>      | 1,593<br>1,504               | 1<br>0       | 0<br>0         | 1,247<br>1,370        | 1<br>0         | 0<br>0         |
| <i>Itga1</i>     | 1,748<br>1,036               | 2<br>0       | 3<br>1         | 3,119<br>2,895        | 13<br>19       | 2<br>0         |
| <i>Ly6c2</i>     | 540<br>553                   | 0<br>0       | 2<br>0         | 1,075<br>1,207        | 0<br>0         | 0<br>0         |
| <i>Ifng</i>      | 427<br>507                   | 8<br>8       | 1<br>0         | 305<br>322            | 0<br>0         | 1<br>0         |
| <i>Il6ra</i>     | 1<br>0                       | 376<br>615   | 68<br>148      | 1<br>3                | 1,427<br>1,505 | 91<br>82       |
| <i>Ccr7</i>      | 25<br>100                    | 654<br>611   | 124<br>165     | 9<br>0                | 461<br>444     | 32<br>75       |
| <i>Il4</i>       | 10<br>44                     | 263<br>307   | 75<br>82       | 6<br>6                | 116<br>136     | 49<br>68       |
| <i>Nrp2*</i>     | 72<br>59                     | 578<br>622   | 31<br>18       | 100<br>143            | 899<br>1,171   | 0<br>4         |
| <i>Slamf6</i>    | 167<br>157                   | 1,016<br>999 | 388<br>382     | 96<br>79              | 648<br>689     | 95<br>109      |
| <i>Sdc1</i>      | 0<br>0                       | 75<br>78     | 3,542<br>3,379 | 4<br>0                | 532<br>540     | 4,508<br>5,057 |
| <i>Rorc</i>      | 223<br>118                   | 73<br>81     | 2,834<br>2,579 | 23<br>60              | 478<br>454     | 2,851<br>2,770 |
| <i>Il23r</i>     | 0<br>0                       | 77<br>72     | 4,004<br>3,574 | 0<br>0                | 480<br>607     | 4,889<br>5,159 |
| <i>Blk</i>       | 6<br>0                       | 85<br>65     | 6,079<br>5,063 | 1<br>0                | 504<br>526     | 6,623<br>7,185 |
| <i>Il1r1</i>     | 2<br>0                       | 77<br>87     | 3,745<br>3,280 | 0<br>0                | 367<br>534     | 3,423<br>3,183 |
| <i>Mmp25</i>     | 0<br>0                       | 9<br>63      | 2,212<br>2,351 | 1<br>0                | 403<br>422     | 3,513<br>3,927 |
| <i>Socs3</i>     | 94<br>223                    | 112<br>82    | 1,196<br>1,287 | 140<br>115            | 193<br>240     | 1,276<br>1,265 |
| <i>Coro2b</i>    | 4<br>0                       | 58<br>142    | 1,197<br>1,521 | 2<br>1                | 220<br>319     | 1,724<br>1,953 |
| <i>Stab2</i>     | 1<br>0                       | 7<br>0       | 1,254<br>931   | 0<br>0                | 51<br>84       | 1,078<br>1,089 |
| <i>Serpinb1a</i> | 5<br>4                       | 5<br>0       | 741<br>429     | 4<br>1                | 87<br>135      | 869<br>975     |
| <i>Ascl1</i>     | 0<br>0                       | 16<br>15     | 852<br>792     | 0<br>0                | 94<br>52       | 619<br>766     |
| <i>Ankrd63*</i>  | 5<br>11                      | 182<br>250   | 1,210<br>1,388 | 1<br>3                | 215<br>151     | 1,214<br>1,045 |

**Supplementary table S1B.** Expression of selected genes differently expressed in young adult versus aged iNKT cells according to sequencing data (numbers of RNA reads). **iNKT1=red**; **iNKT2=green**; **iNKT17=blue**: Numbers>50 reads are colored accordingly when a regulation (ratio reads) >4 between young adult and aged cells was observed. Genes mentioned in the text are in bold. Genes in red shaded box: Genes possibly related to precursor iNKT cells that display down-regulated expression in aged iNKT1 cells.

| Gene          | Reads young adult iNKT cells |                |                | Reads aged iNKT cells |                |                |
|---------------|------------------------------|----------------|----------------|-----------------------|----------------|----------------|
|               | iNKT1                        | iNKT2          | iNKT17         | iNKT1                 | iNKT2p         | iNKT17         |
| <i>Gzma</i>   | 4,106<br>4,140               | 11<br>0        | 6<br>17        | 297<br>265            | 1<br>5         | 2<br>1         |
| <i>Gzmb</i>   | 2,842<br>2,421               | 5<br>0         | 21<br>28       | 1,016<br>1,008        | 0<br>0         | 3<br>0         |
| <i>Myb</i>    | 1,267<br>949                 | 1,693<br>1,660 | 2,217<br>1,942 | 161<br>106            | 1,454<br>1,534 | 1,097<br>817   |
| <i>Ezh2</i>   | 837<br>583                   | 397<br>239     | 313<br>256     | 99<br>151             | 299<br>276     | 88<br>85       |
| <i>Stmn1</i>  | 789<br>600                   | 496<br>451     | 285<br>249     | 108<br>75             | 220<br>187     | 39<br>36       |
| <i>Ccr9</i>   | 587<br>640                   | 427<br>330     | 76<br>128      | 94<br>94              | 703<br>723     | 9<br>31        |
| <i>Sox4</i>   | 502<br>313                   | 494<br>657     | 589<br>550     | 67<br>59              | 574<br>632     | 75<br>99       |
| <i>Tjp1</i>   | 128<br>109                   | 0<br>5         | 11<br>11       | 1,004<br>1,058        | 4<br>2         | 7<br>27        |
| <i>Gas7</i>   | 153<br>80                    | 0<br>0         | 0<br>1         | 516<br>534            | 2<br>8         | 0<br>0         |
| <i>Dntt</i>   | 1,708<br>1,854               | 171<br>174     | 124<br>256     | 124<br>170            | 696<br>604     | 17<br>41       |
| <i>Cd8b1</i>  | 1,350<br>1,012               | 184<br>264     | 114<br>238     | 156<br>197            | 843<br>915     | 32<br>105      |
| <i>Ctsl</i>   | 1,742<br>1,282               | 241<br>228     | 171<br>217     | 157<br>145            | 689<br>746     | 49<br>80       |
| <i>Themis</i> | 981<br>999                   | 541<br>452     | 117<br>154     | 108<br>136            | 889<br>1,182   | 22<br>30       |
| <i>Slpr1</i>  | 102<br>113                   | 459<br>261     | 68<br>57       | 233<br>242            | 98<br>162      | 10<br>5        |
| <i>Igf1r</i>  | 33<br>2                      | 160<br>342     | 2,647<br>3,552 | 73<br>62              | 2,440<br>3,025 | 6,483<br>6,629 |
| <i>Rad50</i>  | 280<br>137                   | 133<br>179     | 304<br>401     | 513<br>507            | 625<br>639     | 803<br>711     |
| <i>Prg4</i>   | 10<br>0                      | 312<br>487     | 73<br>93       | 93<br>82              | 1,688<br>1,296 | 379<br>490     |
| <i>Pcsk1</i>  | 9<br>0                       | 416<br>260     | 459<br>523     | 0<br>3                | 25<br>78       | 43<br>48       |
| <i>Igfbp4</i> | 130<br>148                   | 2,072<br>1,280 | 810<br>638     | 7<br>6                | 458<br>712     | 26<br>34       |
| <i>Flt4</i>   | 0<br>0                       | 0<br>0         | 88<br>95       | 1<br>0                | 66<br>54       | 1,008<br>954   |
| <i>Il2ra</i>  | 195<br>48                    | 14<br>23       | 346<br>391     | 88<br>85              | 281<br>275     | 1,842<br>1,871 |

**Supplementary table S2A.** Expression of replication-dependent histone genes in young and aged iNKT cells. Given are the read numbers for the 15 most highly expressed histone genes in young adult BALB/c mice. The degree of down regulation in aged iNKT subtypes was determined by the ratios of values obtained for the corresponding population. For example for *Hist1h1c* expression by iNKT1 cells:  $1y/o = (17,084+19016) : (5442+5172) = 3,40$ . Genes depicted in red: the degree of downregulation is high for iNKT1 (>14) and higher than average also for iNKT17 (>5). For the latter the degree of down regulation is rather uniform:  $2,27 \pm 0,48$  ( $\pm$ SD).

| Gene             | Reads young adult iNKT cells |                |                | Reads aged iNKT cells (+ ratio regulation) |      |                |      |                |       |
|------------------|------------------------------|----------------|----------------|--------------------------------------------|------|----------------|------|----------------|-------|
|                  | iNKT1                        | iNKT2          | iNKT17         | iNKT1                                      | 1y/o | iNKT2p         | 2y/o | iNKT17         | 17y/o |
| <i>Hist1h1c</i>  | 17,084<br>19,016             | 9,744<br>5,022 | 7,386<br>4,939 | 5,442<br>5,172                             | 3,40 | 4,029<br>4,093 | 1,82 | 4,047<br>3,834 | 1,56  |
| <i>Hist1h1d</i>  | 8,927<br>12,178              | 4,752<br>2,524 | 2,305<br>1,832 | 674<br>776                                 | 14,6 | 1,513<br>1,380 | 2,52 | 350<br>460     | 5,11  |
| <i>Hist2h2bb</i> | 8,082<br>11,692              | 3,932<br>2,295 | 3,234<br>2,457 | 1,533<br>1,937                             | 5,70 | 1,224<br>1,252 | 2,51 | 1,733<br>2,025 | 1,51  |
| <i>Hist1h1e</i>  | 5,095<br>4,223               | 3,193<br>2,334 | 2,581<br>2,116 | 1,409<br>1,403                             | 3,31 | 1,334<br>1,206 | 2,18 | 1,146<br>1,098 | 2,09  |
| <i>Hist1h4d</i>  | 4,143<br>6,971               | 2,927<br>2,155 | 1,524<br>1,686 | 1,391<br>1,303                             | 4,13 | 1,053<br>839   | 2,69 | 913<br>696     | 2,00  |
| <i>Hist2h2ac</i> | 3,688<br>6,231               | 2,327<br>1,290 | 1,631<br>1,208 | 849<br>789                                 | 6,06 | 839<br>686     | 2,37 | 1,024<br>779   | 1,57  |
| <i>Hist1h1b</i>  | 3,353<br>4,234               | 1,084<br>428   | 418<br>391     | 86<br>98                                   | 41,2 | 343<br>240     | 2,59 | 19<br>35       | 15,0  |
| <i>Hist1h1a</i>  | 3,337<br>4,475               | 803<br>464     | 409<br>508     | 112<br>112                                 | 34,9 | 262<br>317     | 2,19 | 30<br>92       | 7,52  |
| <i>Hist1h2be</i> | 2,617<br>3,629               | 1,193<br>620   | 423<br>484     | 540<br>615                                 | 5,41 | 456<br>427     | 2,05 | 207<br>310     | 1,75  |
| <i>Hist1h2bn</i> | 2,347<br>2,990               | 589<br>326     | 263<br>233     | 68<br>86                                   | 34,7 | 175<br>261     | 2,10 | 13<br>69       | 6,05  |
| <i>Hist4h4</i>   | 2,228<br>3,886               | 2,495<br>1,646 | 1,409<br>1,129 | 888<br>765                                 | 3,70 | 763<br>601     | 3,04 | 756<br>483     | 2,05  |
| <i>Hist1h2ak</i> | 2,223<br>2,400               | 623<br>450     | 292<br>362     | 132<br>127                                 | 17,9 | 301<br>372     | 1,59 | 54<br>112      | 3,94  |
| <i>Hist1h2af</i> | 2,090<br>2,500               | 416<br>284     | 214<br>217     | 67<br>85                                   | 30,2 | 239<br>311     | 1,27 | 25<br>21       | 9,37  |
| <i>Hist1h3b</i>  | 1,535<br>2,324               | 424<br>222     | 168<br>191     | 52<br>68                                   | 32,2 | 145<br>155     | 2,15 | 10<br>27       | 9,70  |
| <i>Hist1h4h</i>  | 1,439<br>2,021               | 1,014<br>755   | 569<br>615     | 330<br>295                                 | 5,54 | 324<br>266     | 3,00 | 269<br>261     | 2,23  |

**Supplementary Table S2B.** Expression of replication-independent histone genes in young and aged iNKT cells. Setup of the table as in S2A.

| Gene         | Reads young adult iNKT cells |                |                | Reads aged iNKT cells (+ ratio regulation) |      |                |      |                |       |
|--------------|------------------------------|----------------|----------------|--------------------------------------------|------|----------------|------|----------------|-------|
|              | iNKT1                        | iNKT2          | iNKT17         | iNKT1                                      | 1y/o | iNKT2p         | 2y/o | iNKT17         | 17y/o |
| <i>H2afx</i> | 1,818<br>1,656               | 693<br>524     | 437<br>420     | 284<br>242                                 | 6,60 | 388<br>292     | 1,79 | 211<br>189     | 2,14  |
| <i>H2afy</i> | 1,688<br>970                 | 1,096<br>1,159 | 1,263<br>1,025 | 1,310<br>1,282                             | 1,02 | 1,026<br>1,011 | 1,11 | 820<br>727     | 1,48  |
| <i>H2afz</i> | 1,145<br>1,355               | 747<br>448     | 708<br>574     | 573<br>519                                 | 2,29 | 383<br>396     | 1,53 | 484<br>361     | 1,52  |
| <i>H2afj</i> | 742<br>1,238                 | 816<br>796     | 542<br>462     | 624<br>552                                 | 1,68 | 431<br>498     | 1,74 | 405<br>339     | 1,35  |
| <i>H2afv</i> | 452<br>361                   | 305<br>303     | 279<br>331     | 219<br>256                                 | 1,71 | 203<br>181     | 1,58 | 242<br>261     | 1,21  |
| <i>H3f3b</i> | 2,899<br>3,433               | 2,741<br>2,030 | 2,391<br>1,849 | 1,597<br>1,789                             | 1,87 | 1,565<br>2,091 | 1,30 | 1,328<br>1,486 | 1,51  |
| <i>H3f3a</i> | 312<br>524                   | 575<br>408     | 422<br>410     | 256<br>273                                 | 1,58 | 298<br>295     | 1,66 | 312<br>237     | 1,52  |

**Supplementary table S3.** Expression of selected genes in young adult and aged iNKT cells according to sequencing data (RNA reads). Data source as in Fig. 2.

| Gene                      | Reads young adult iNKT cells |              |                | Reads aged iNKT cells |                |                |
|---------------------------|------------------------------|--------------|----------------|-----------------------|----------------|----------------|
|                           | iNKT1                        | iNKT2        | iNKT17         | iNKT1                 | iNKT2p         | iNKT17         |
| <i>Scart2<sup>1</sup></i> | 186<br>135                   | 602<br>685   | 4,665<br>3,741 | 149<br>125            | 625<br>846     | 5,247<br>4,909 |
| <i>Aqp3</i>               | 104<br>128                   | 58<br>65     | 1,389<br>1,090 | 100<br>111            | 179<br>281     | 1,595<br>1,592 |
| <i>Camk2d</i>             | 289<br>298                   | 148<br>159   | 234<br>251     | 341<br>381            | 234<br>306     | 269<br>277     |
| <i>Gpr183</i>             | 1,227<br>1,741               | 437<br>418   | 1,435<br>1,187 | 1,547<br>1,765        | 569<br>802     | 1,677<br>1,644 |
| <i>Sox13</i>              | 16<br>4                      | 532<br>1,100 | 1,260<br>2,583 | 13<br>15              | 1,483<br>1,268 | 2,766<br>3,074 |
| <i>Fasl</i>               | 869<br>1,092                 | 36<br>20     | 9<br>7         | 884<br>878            | 34<br>25       | 7<br>35        |
| <i>Tnfsf10</i>            | 1,776<br>1,281               | 413<br>410   | 244<br>249     | 1,363<br>1,361        | 389<br>363     | 263<br>278     |
|                           |                              |              |                |                       |                |                |

1) Scart2 = 5830411N06Rik

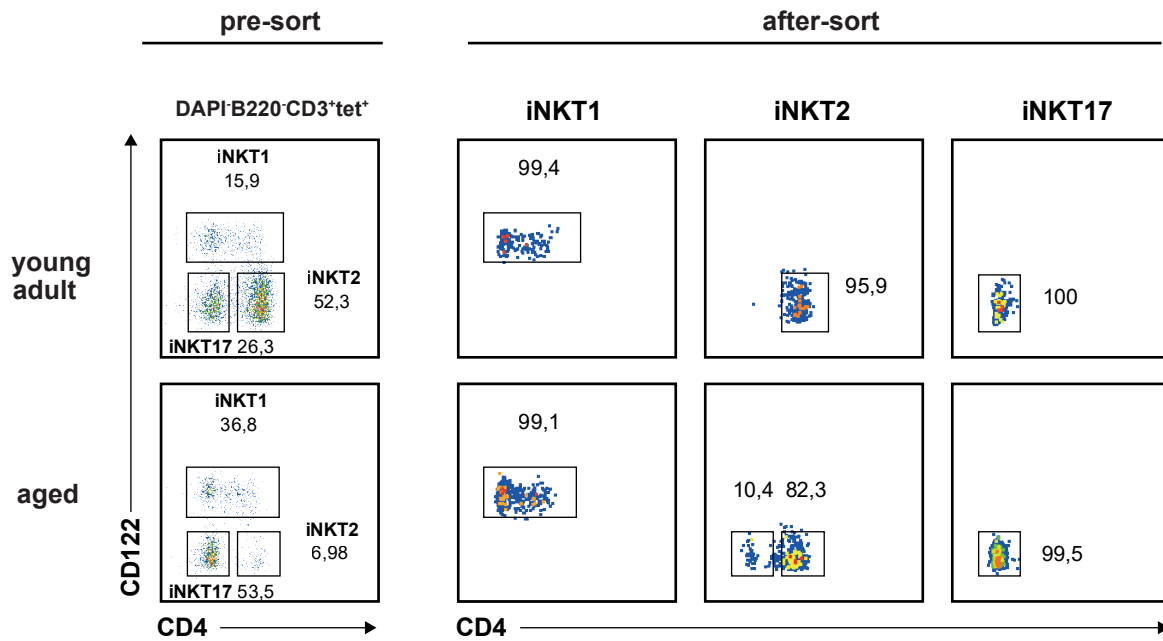

**Supplementary Figure 1. Sorting strategy of iNKT subsets from young adult and aged mice.** The plots illustrate the gating strategy (pre-sort) for live cell sorts (one out of two performed) to obtain iNKT subpopulations as also shown in Fig. 1B but using a flow cytometry sorter. In each experiment thymic cells were pooled from either 3 young adult (upper panel) or 3 aged (lower panel) BALB/c mice. After-sort: Small aliquots of sorted subsets were re-analyzed to check for purity that is indicated by the numbers accompanying the gates. Note that in aged iNKT2 cells an impurity of approximately 10% iNKT17 cells was found.

**A**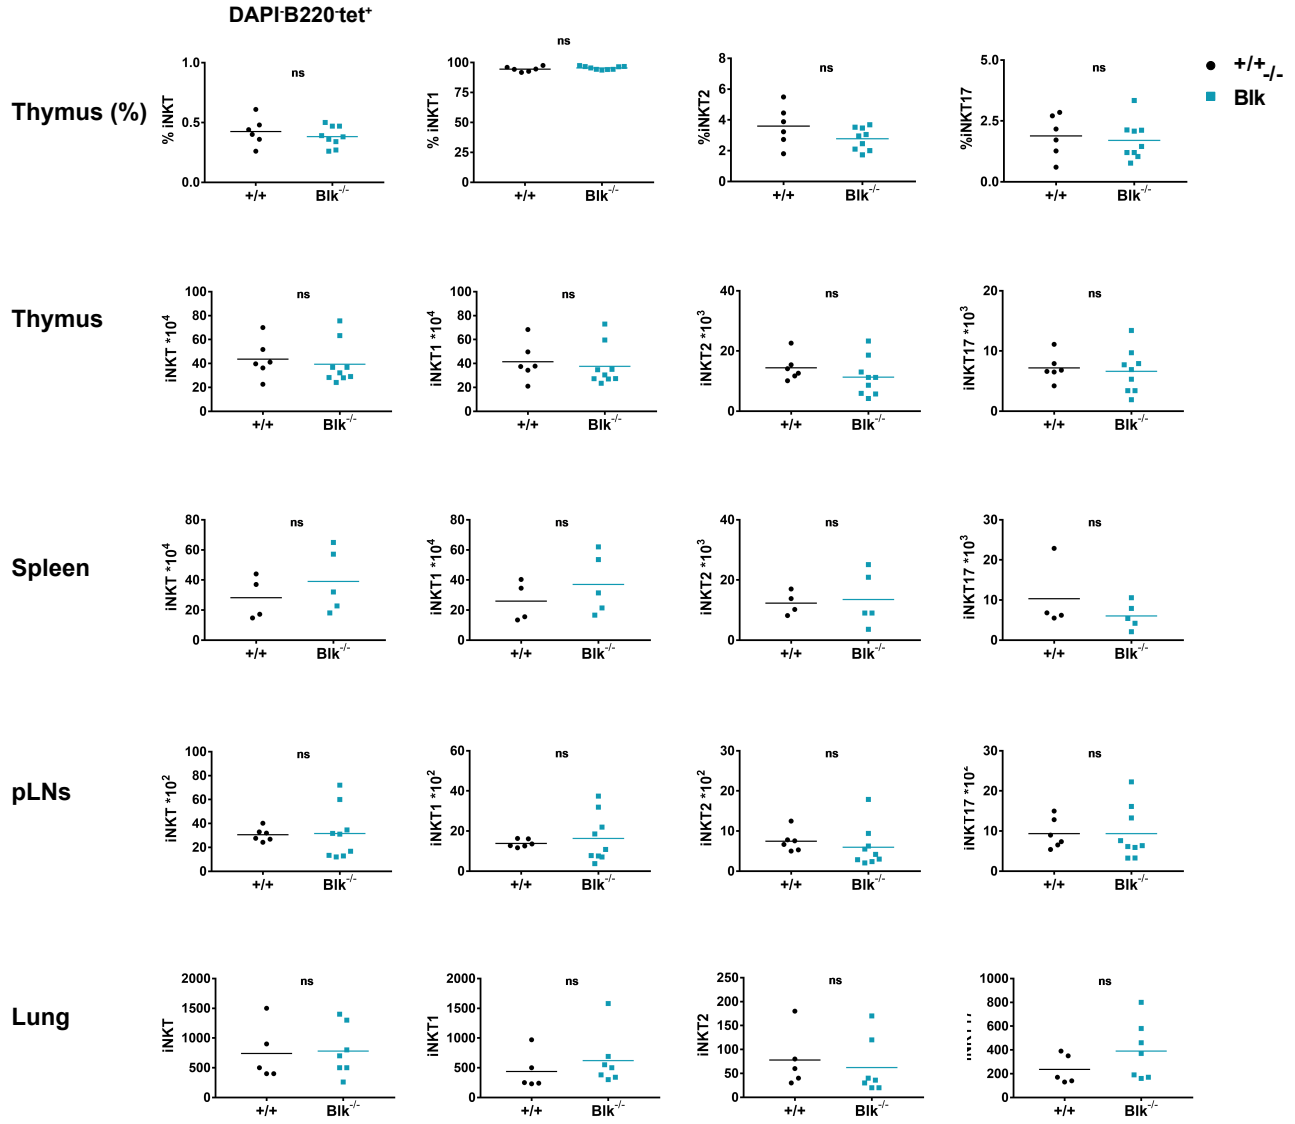**B**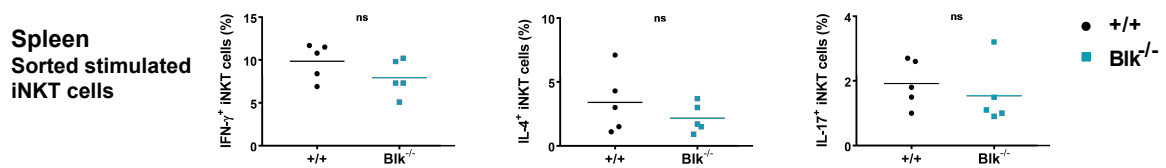

**Supplementary Figure 2. *Blk* deficiency does not have an impact on iNKT cell frequencies and cytokine production.** (A) iNKT cell frequencies and cell numbers in BL6 wt and *Blk*<sup>-/-</sup> mice as determined by flow cytometry. Gating as shown in fig. 1B. Data were summarized from at least 3 independent experiments. Each dot represents data from one animal. (B) IFN- $\gamma$ , IL-4 and IL-17 production of iNKT cells from wt and *Blk*<sup>-/-</sup> BL6. Total splenic iNKT cells were sorted and stimulated with anti-CD3 and anti-CD28 for 16h as described in Experimental Procedures. Data are collected from 5 independent experiments (dots) and statistically evaluated with unpaired t test. ns: not significant.

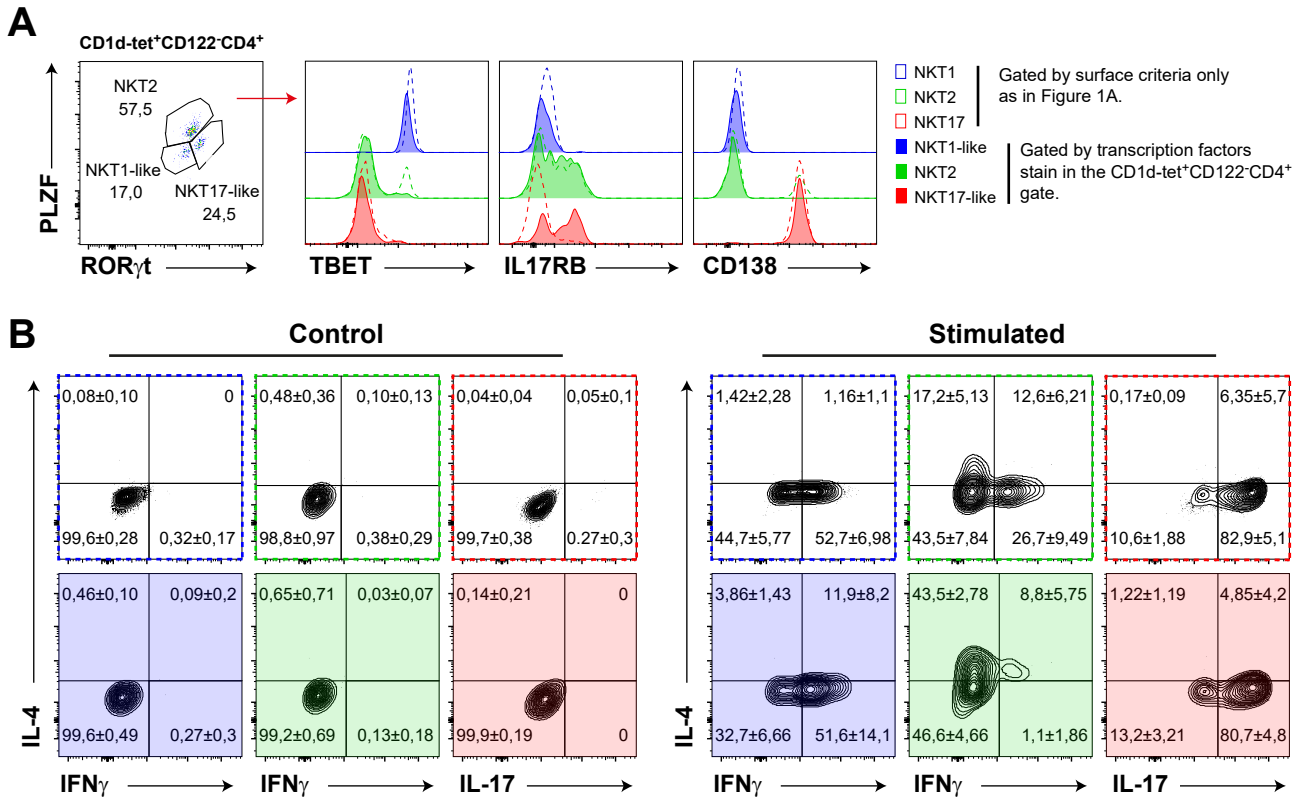

**Supplementary Figure 3. Characterization of aged iNKT2p cells.** (A) Thymi from 35 week old female BALB/c mice were investigated by flow cytometry. Gating for surface markers was done as shown in Figure 1A. The representative plot (left panel) depicts the three main subsets in aged iNKT2p cells based on additional stain for PLZF and ROR $\gamma$ t (see also Figure 1B). The histograms (middle part) show the expression of TBET, IL17RB and CD138 (syndecan) by either iNKT1 (CD122<sup>+</sup>CD4<sup>+</sup>), iNKT2 (CD122<sup>+</sup>CD4<sup>+</sup>) and iNKT17 (CD122<sup>+</sup>CD4<sup>+</sup>) cells based only on gating by surface markers (dashed lines) or by the subsets of aged iNKT2p cells in the CD122<sup>+</sup>CD4<sup>+</sup> gate but now gated additionally according to their expression of PLZF and ROR (filled and colored). (B) Production of cytokines as indicated following PMA/ionomycin stimulation. Open boxes (framed by dashed lines) correspond to the cytokine production profile of cells gated by surface markers only (as in A) or by the cells dissected further into the iNKT2p subpopulations as defined by PLZF/ROR $\gamma$ t expression. Data are shown for 5 mice (thymi) analyzed (mean $\pm$ SD).



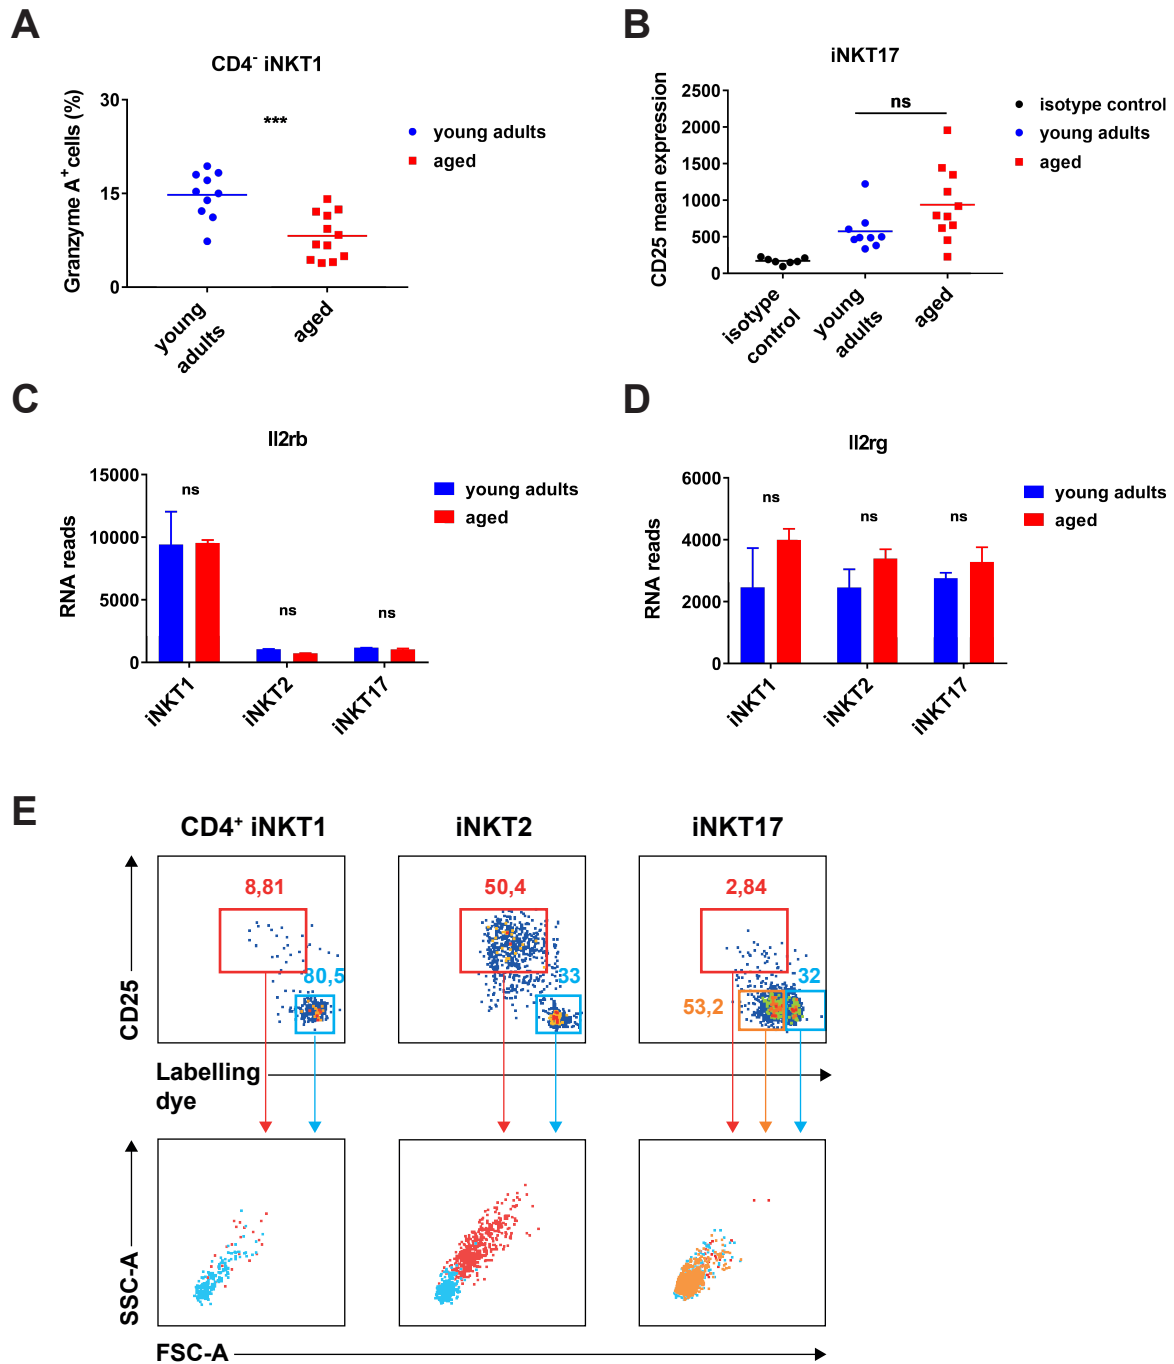

**Supplementary Figure 4.** (A) Granzyme A<sup>+</sup> cell frequencies among thymic CD4<sup>-</sup>iNKT1 cells from young adult and aged BL6 mice using the same analytic strategy as for BALB/c cells (Fig. 3I). Data are collected from 5 independent experiments. Each dot represents data from one animal. (B) Mean expression of CD25 in thymic iNKT17 cells from young adult and aged BL6 mice using the same gating strategy as for BALB/c cells (Fig. 4B). Data are collected from 5 independent experiments. Each dot represents data from one animal. (C-D) *Il2rb* and *Il2rg* RNA reads (mean ± sd), same source as in Fig.2. (E) Alternative presentation of levels of CD25 and cell tracker dye (upper panel) in the iNKT cell subsets displayed in Fig 4E as well as forward/side scatter of the color-gated populations (lower panel) on day 3 after stimulation with IL2. Unpaired t test was performed in (A). One-way ANOVA followed by Tukey's multiple comparisons test were performed in (B). Two-way ANOVA followed by Sidak's multiple comparisons test were performed in (C) and (D). \*\*\*p < 0.001, ns=not significant.
